# Supplementary material for: Tetranuclear lanthanide complexes showing magnetic refrigeration and single molecule magnet behavior
Source: Royal Society of Chemistry journal article supplement (doi:10.1039/c8nj05109g), 2019-01-01
Supplement: c8nj05109g1.pdf [file c8nj05109g1.pdf]

## Tetranuclear lanthanide complexes showing magnetic refrigeration and single molecule magnet behavior

Hong Yu,<sup>a</sup> Jia-Xing Yang,<sup>b</sup> Ju-Qing Han,<sup>b</sup> Peng-Fei Li,<sup>a</sup> Yin-Ling

Hou,<sup>d</sup> \*Wen-Min Wang,<sup>b</sup> \* Ming Fang<sup>a, c\*</sup>

*a* Department of Chemistry, Hebei Normal University of Science & Technology, Qinhuangdao 066004, Hebei province, P. R.China. E-mail:fangmingchem@163.com

*b* Department of Chemistry, Taiyuan Normal University, Jinzhong 030619, PR China. E-mail: wangwenmin0506@126.com

*c* Key Laboratory of Advanced Energy Materials Chemistry (Ministry of Education), College of Chemistry, Nankai University, Tianjin 300071, China

*d* School of Life and Health Science, Kaili University, Kaili, 556011, China, hyl0506@126.com

### Electronic supplementary information

**Table S1** Selected bond lengths (Å) and angles (°) for complex **1**<sup>a</sup>

| <b>Bond lengths</b> |           |                   |           |
|---------------------|-----------|-------------------|-----------|
| Gd(2)-O(1)          | 2.365(10) | Gd(2)-O(2)        | 2.463(11) |
| Gd(2)-O(3)          | 2.370(10) | Gd(2)-O(8)#1      | 2.369(10) |
| Gd(2)-O(8)          | 2.416(10) | Gd(2)-O(7)        | 2.338(10) |
| Gd(2)-N(5)          | 2.563(12) | Gd(2)-O(6)        | 2.341(12) |
| Gd(3)-O(1)          | 2.372(10) | Gd(3)-O(2)        | 2.395(11) |
| Gd(3)-O(3)#1        | 2.424(10) | Gd(3)-O(8)        | 2.325(11) |
| Gd(3)-O(5)          | 2.320(11) | Gd(3)-N(3)        | 2.559(14) |
| Gd(3)-O(4)          | 2.283(11) | Gd(3)-N(1)        | 2.558(12) |
| <b>Bond angles</b>  |           |                   |           |
| O(1)-Gd(2)-O(2)     | 66.7(4)   | O(1)-Gd(2)-O(3)   | 147.1(4)  |
| O(1)-Gd(2)-O(8)     | 71.1(4)   | O(1)-Gd(2)-O(8)#1 | 77.1(4)   |
| O(1)-Gd(2)-N(5)     | 137.3(4)  | O(2)-Gd(2)-N(5)   | 75.3(4)   |
| O(3)-Gd(2)-O(2)     | 141.9(4)  | O(3)-Gd(2)-O(8)   | 101.1(4)  |
| O(3)-Gd(2)-N(5)     | 66.7(4)   | O(8)-Gd(2)-N(5)   | 78.0(4)   |
| O(8)-Gd(2)-O(2)     | 69.3(4)   | O(8)#1-Gd(2)-O(2) | 132.4(4)  |
| O(8)#1-Gd(2)-O(3)   | 70.3(4)   | O(8)#1-Gd(2)-O(8) | 70.4(4)   |
| O(7)-Gd(2)-O(1)     | 81.5(4)   | O(7)-Gd(2)-O(2)   | 123.3(4)  |
| O(7)-Gd(2)-O(3)     | 87.6(4)   | O(7)-Gd(2)-O(8)   | 141.8(3)  |
| O(7)-Gd(2)-O(8)#1   | 78.0(3)   | O(7)-Gd(2)-O(6)   | 71.8(4)   |
| O(8)#1-Gd(2)-N(5)   | 119.2(4)  | O(7)-Gd(2)-N(5)   | 138.0(4)  |
| O(6)-Gd(2)-O(1)     | 114.7(4)  | O(6)-Gd(2)-O(2)   | 80.5(4)   |
| O(6)-Gd(2)-O(3)     | 90.7(4)   | O(6)-Gd(2)-O(8)   | 144.1(4)  |

|                   |          |                   |          |
|-------------------|----------|-------------------|----------|
| O(6)-Gd(2)-O(8)#1 | 144.9(4) | O(1)-Gd(3)-O(2)   | 67.7(3)  |
| O(1)-Gd(3)-O(3)#1 | 79.0(4)  | O(2)-Gd(3)-O(3)#1 | 135.3(3) |
| O(6)-Gd(2)-N(5)   | 75.8(4)  | O(1)-Gd(3)-N(3)   | 109.2(4) |
| O(1)-Gd(3)-N(1)   | 65.7(4)  | O(2)-Gd(3)-N(3)   | 66.8(4)  |
| O(2)-Gd(3)-N(1)   | 108.2(4) | O(8)-Gd(3)-N(3)   | 133.4(4) |
| O(8)-Gd(3)-O(1)   | 72.6(3)  | O(8)-Gd(3)-O(2)   | 72.0(4)  |
| O(8)-Gd(3)-N(1)   | 133.5(4) | O(5)-Gd(3)-N(3)   | 78.9(4)  |
| O(8)-Gd(3)-O(3)#1 | 70.1(3)  | O(5)-Gd(3)-O(1)   | 140.7(3) |
| O(5)-Gd(3)-O(2)   | 82.0(4)  | O(5)-Gd(3)-O(3)#1 | 109.5(4) |
| O(5)-Gd(3)-O(8)   | 74.7(3)  | O(4)-Gd(3)-O(1)   | 144.0(4) |
| O(4)-Gd(3)-O(2)   | 141.3(4) | O(4)-Gd(3)-O(3)#1 | 82.3(4)  |
| O(4)-Gd(3)-O(8)   | 128.3(4) | O(4)-Gd(3)-O(5)   | 74.7(4)  |
| O(5)-Gd(3)-N(1)   | 151.5(4) | O(4)-Gd(3)-N(3)   | 78.5(5)  |
| O(4)-Gd(3)-N(1)   | 81.7(4)  | N(1)-Gd(3)-N(3)   | 81.0(4)  |

<sup>a</sup>Symmetry transformations used to generate equivalent atoms: #1 -x,-y+1,-z+2.

**Table S2** Selected bond lengths (Å) and angles (°) for complex **2<sup>a</sup>**

|                     |            |                   |            |
|---------------------|------------|-------------------|------------|
| <b>Bond lengths</b> |            |                   |            |
| Tb(2)-O(6)          | 2.349(4)   | Tb(2)-O(2)#1      | 2.359(3)   |
| Tb(2)-O(5)          | 2.334(4)   | Tb(2)-O(4)#1      | 2.371(4)   |
| Tb(2)-O(4)          | 2.395(4)   | Tb(2)-N(6)        | 2.552(4)   |
| Tb(2)-O(1)          | 2.466(4)   | Tb(2)-O(3)        | 2.370(4)   |
| Tb(3)-O(2)          | 2.372(4)   | Tb(3)-O(8)        | 2.335(4)   |
| Tb(3)-O(4)#1        | 2.332(4)   | Tb(3)-O(1)#1      | 2.380(4)   |
| Tb(3)-O(7)          | 2.309(4)   | Tb(3)-N(4)        | 2.539(5)   |
| Tb(3)-O(3)          | 2.416(4)   | Tb(3)-N(2)#1      | 2.542(5)   |
| <b>Bond angles</b>  |            |                   |            |
| O(6)-Tb(2)-O(2)#1   | 114.97(14) | O(6)-Tb(2)-O(4)   | 144.74(14) |
| O(6)-Tb(2)-O(4)#1   | 144.54(14) | O(6)-Tb(2)-N(6)   | 75.70(15)  |
| O(6)-Tb(2)-O(1)     | 81.59(14)  | O(6)-Tb(2)-O(3)   | 89.91(14)  |
| O(2)#1-Tb(2)-N(6)   | 138.03(14) | O(2)#1-Tb(2)-O(4) | 71.51(13)  |
| O(2)#1-Tb(2)-O(4)#1 | 76.97(13)  | O(2)#1-Tb(2)-O(1) | 66.31(13)  |
| O(2)#1-Tb(2)-O(3)   | 147.21(13) | O(5)-Tb(2)-O(6)   | 71.12(14)  |
| O(5)-Tb(2)-O(2)#1   | 81.66(13)  | O(5)-Tb(2)-O(4)#1 | 78.39(14)  |
| O(5)-Tb(2)-O(4)     | 142.08(13) | O(5)-Tb(2)-O(1)   | 123.42(14) |
| O(5)-Tb(2)-O(3)     | 87.19(13)  | O(5)-Tb(2)-N(6)   | 137.15(14) |
| O(4)#1-Tb(2)-O(4)   | 69.93(15)  | O(4)#1-Tb(2)-O(4) | 69.93(15)  |
| O(4)-Tb(2)-N(6)     | 78.30(13)  | O(4)#1-Tb(2)-O(1) | 131.65(13) |
| O(4)#1-Tb(2)-N(6)   | 119.01(14) | O(1)-Tb(2)-N(6)   | 76.21(13)  |
| O(4)-Tb(2)-O(1)     | 69.31(13)  | O(3)-Tb(2)-O(4)   | 100.96(13) |
| O(3)-Tb(2)-N(6)     | 66.19(13)  | O(3)-Tb(2)-O(4)#1 | 70.59(12)  |
| O(3)-Tb(2)-O(1)     | 142.39(12) | O(2)-Tb(3)-N(4)   | 65.76(14)  |

|                   |            |                     |            |
|-------------------|------------|---------------------|------------|
| O(2)-Tb(3)-O(1)#1 | 67.52(13)  | O(2)-Tb(3)-O(3)     | 79.40(13)  |
| O(2)-Tb(3)-N(4)   | 65.76(14)  | O(2)-Tb(3)-N(2)#1   | 108.50(16) |
| O(8)-Tb(3)-N(4)   | 151.29(15) | O(8)-Tb(3)-N(2)#1   | 78.79(16)  |
| O(8)-Tb(3)-O(2)   | 140.84(13) | O(8)-Tb(3)-O(1)#1   | 82.16(14)  |
| O(8)-Tb(3)-O(3)   | 109.37(14) | O(4)#1-Tb(3)-O(2)   | 72.39(13)  |
| O(4)#1-Tb(3)-O(8) | 75.05(14)  | O(4)#1-Tb(3)-O(1)#1 | 71.86(14)  |
| O(4)#1-Tb(3)-N(4) | 133.38(14) | O(4)#1-Tb(3)-N(2)#1 | 132.62(15) |
| O(4)#1-Tb(3)-O(3) | 70.43(12)  | O(1)#1-Tb(3)-O(3)   | 135.62(13) |
| O(1)#1-Tb(3)-N(4) | 108.24(14) | O(1)#1-Tb(3)-N(2)#1 | 65.93(15)  |
| O(7)-Tb(3)-O(2)   | 144.48(13) | O(7)-Tb(3)-O(8)     | 74.27(14)  |
| O(7)-Tb(3)-O(4)#1 | 129.03(15) | O(7)-Tb(3)-O(1)#1   | 140.48(14) |
| O(7)-Tb(3)-O(3)   | 82.79(14)  | O(7)-Tb(3)-N(4)     | 81.63(15)  |
| O(7)-Tb(3)-N(2)#1 | 78.51(17)  | N(4)-Tb(3)-N(2)#1   | 81.35(16)  |
| O(3)-Tb(3)-N(4)   | 82.31(14)  | O(3)-Tb(3)-N(2)#1   | 156.71(14) |

<sup>a</sup>Symmetry transformations used to generate equivalent atoms: #1 -x+1,-y,-z+1.

**Table S3** Selected bond lengths (Å) and angles (°) for complex **3<sup>a</sup>**

|                     |            |                   |            |
|---------------------|------------|-------------------|------------|
| <b>Bond lengths</b> |            |                   |            |
| Dy(1)-O(3)          | 2.421(4)   | Dy(1)-O(2)        | 2.359(4)   |
| Dy(1)-O(7)          | 2.294(4)   | Dy(1)-O(8)        | 2.352(4)   |
| Dy(1)-O(8)#1        | 2.347(4)   | Dy(1)-O(1)        | 2.420(4)   |
| Dy(1)-O(6)          | 2.320(4)   | Dy(1)-N(4)        | 2.558(5)   |
| Dy(2)-O(3)          | 2.375(4)   | Dy(2)-O(2)#1      | 2.385(4)   |
| Dy(2)-O(8)          | 2.340(4)   | Dy(2)-O(1)        | 2.358(4)   |
| Dy(2)-O(5)          | 2.323(4)   | Dy(2)-O(4)        | 2.290(4)   |
| Dy(2)-N(6)          | 2.533(5)   | Dy(2)-N(2)        | 2.525(5)   |
| <b>Bond angles</b>  |            |                   |            |
| O(3)-Dy(1)-N(4)     | 77.47(15)  | O(2)-Dy(1)-N(4)   | 66.33(15)  |
| O(2)-Dy(1)-O(3)     | 143.79(14) | O(2)-Dy(1)-O(1)   | 147.62(14) |
| O(7)-Dy(1)-O(3)     | 84.82(13)  | O(7)-Dy(1)-O(2)   | 83.26(14)  |
| O(7)-Dy(1)-O(8)     | 144.22(14) | O(7)-Dy(1)-O(8)#1 | 142.42(14) |
| O(7)-Dy(1)-O(1)     | 120.08(14) | O(7)-Dy(1)-O(6)   | 73.17(14)  |
| O(7)-Dy(1)-N(4)     | 72.10(15)  | O(8)-Dy(1)-O(3)   | 70.18(14)  |
| O(8)#1-Dy(1)-O(3)   | 132.00(14) | O(8)#1-Dy(1)-O(2) | 70.22(14)  |
| O(8)-Dy(1)-O(2)     | 101.79(14) | O(8)#1-Dy(1)-O(8) | 69.55(16)  |
| O(8)#1-Dy(1)-O(1)   | 78.25(14)  | O(8)-Dy(1)-O(1)   | 73.01(14)  |
| O(8)#1-Dy(1)-N(4)   | 117.35(15) | O(8)-Dy(1)-N(4)   | 77.63(15)  |
| O(1)-Dy(1)-O(3)     | 65.84(14)  | O(1)-Dy(1)-N(4)   | 138.83(15) |
| O(6)-Dy(1)-O(3)     | 125.42(14) | O(6)-Dy(1)-O(2)   | 83.11(15)  |
| O(6)-Dy(1)-O(8)#1   | 77.52(14)  | O(6)-Dy(1)-O(8)   | 142.36(14) |

|                   |            |                   |            |
|-------------------|------------|-------------------|------------|
| O(6)-Dy(1)-O(1)   | 83.08(14)  | O(6)-Dy(1)-N(4)   | 135.70(15) |
| O(3)-Dy(2)-O(2)#1 | 135.23(14) | O(3)-Dy(2)-N(6)   | 66.33(15)  |
| O(3)-Dy(2)-N(2)   | 114.14(15) | O(2)#1-Dy(2)-N(6) | 155.77(16) |
| O(2)#1-Dy(2)-N(2) | 78.47(15)  | O(8)-Dy(2)-N(6)   | 134.35(16) |
| O(8)-Dy(2)-O(3)   | 71.19(14)  | O(8)-Dy(2)-O(2)#1 | 69.88(13)  |
| O(8)-Dy(2)-O(1)   | 74.35(14)  | O(8)-Dy(2)-N(2)   | 132.35(16) |
| O(1)-Dy(2)-N(6)   | 103.19(16) | O(1)-Dy(2)-O(3)   | 67.53(14)  |
| O(1)-Dy(2)-O(2)#1 | 81.34(13)  | O(1)-Dy(2)-N(2)   | 66.26(16)  |
| O(5)-Dy(2)-N(6)   | 84.68(16)  | O(5)-Dy(2)-O(3)   | 83.09(14)  |
| O(5)-Dy(2)-O(2)#1 | 106.43(14) | O(5)-Dy(2)-O(8)   | 74.23(15)  |
| O(5)-Dy(2)-O(1)   | 142.38(15) | O(5)-Dy(2)-N(2)   | 150.88(17) |
| O(4)-Dy(2)-N(6)   | 78.31(17)  | O(4)-Dy(2)-O(3)   | 139.32(15) |
| O(4)-Dy(2)-O(2)#1 | 84.12(15)  | O(4)-Dy(2)-O(8)   | 130.47(15) |
| O(4)-Dy(2)-O(1)   | 143.55(15) | O(4)-Dy(2)-O(5)   | 73.92(16)  |
| O(4)-Dy(2)-N(2)   | 78.17(17)  | N(2)-Dy(2)-N(6)   | 81.68(17)  |

<sup>a</sup>Symmetry transformations used to generate equivalent atoms: #1 -x,-y+1,-z+2.

**Table S4** The Dy<sup>III</sup> geometry analysis by SHAPE 2.0 for **3**.

|                    | $D_{4d}$ SAPR | $D_{2d}$ TDD | $C_{2v}$ JBTPR | $C_{2v}$ BTPR | $D_{2d}$ JSD |
|--------------------|---------------|--------------|----------------|---------------|--------------|
| Dy1 <sup>III</sup> | 0.965         | 3.138        | 3.377          | 2.760         | 5.524        |
| Dy2 <sup>III</sup> | 1.360         | 1.643        | 2.902          | 2.120         | 2.120        |

SAPR = Square antiprism, TDD = Triangular dodecahedron, JBTPR = Biaugmented trigonal prism J50, BTPR = Biaugmented trigonal prism, JSD = Snub diphenoid J84.

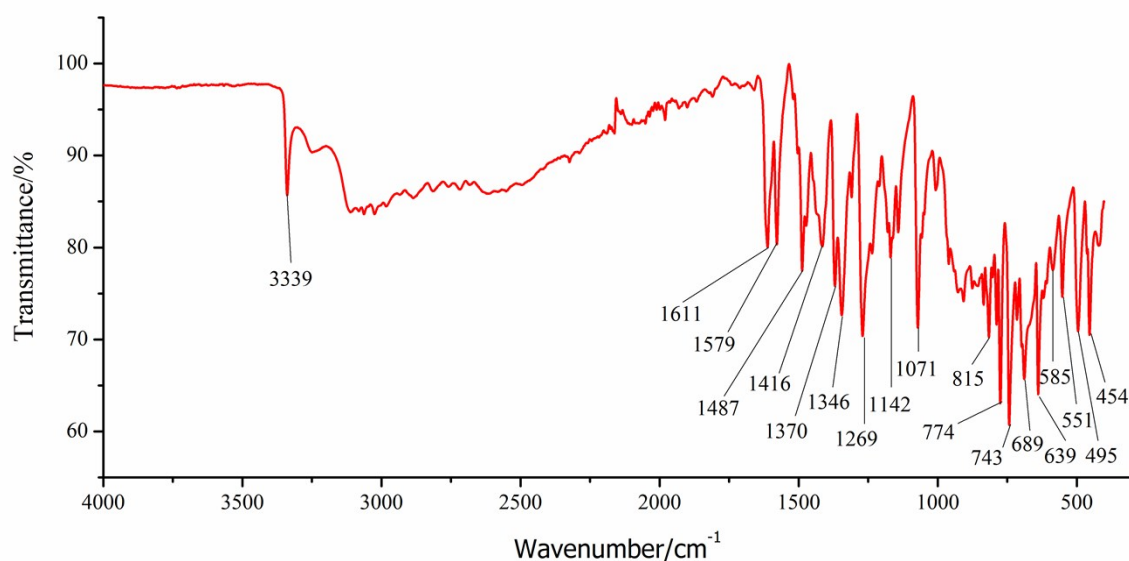

**Figure S1.** The IR spectra for 5-(benzylideneamino)quinolin-8-ol (HL).

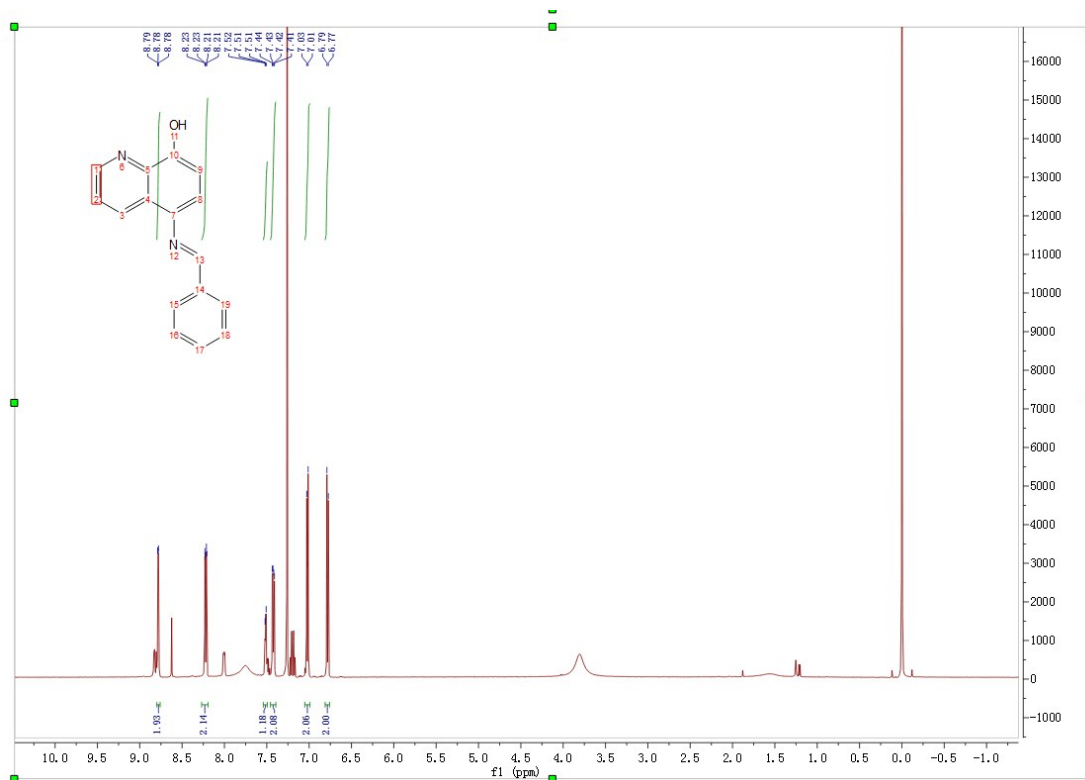

Figure S2.  $^1\text{H}$  NMR spectrum (500 MHz,  $\text{CDCl}_3$ ) of HL.

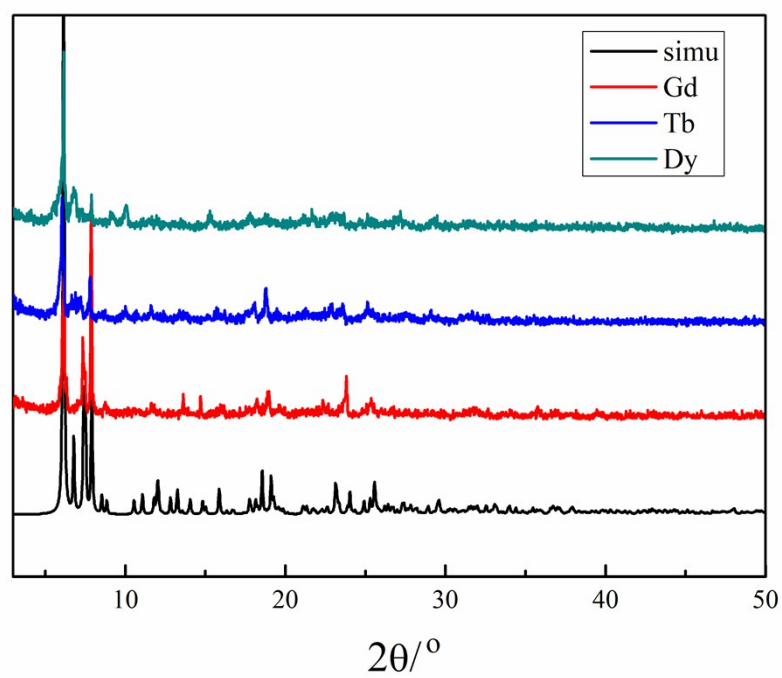

Figure S3. The simulated and experimental PXRD patterns for 1-3.

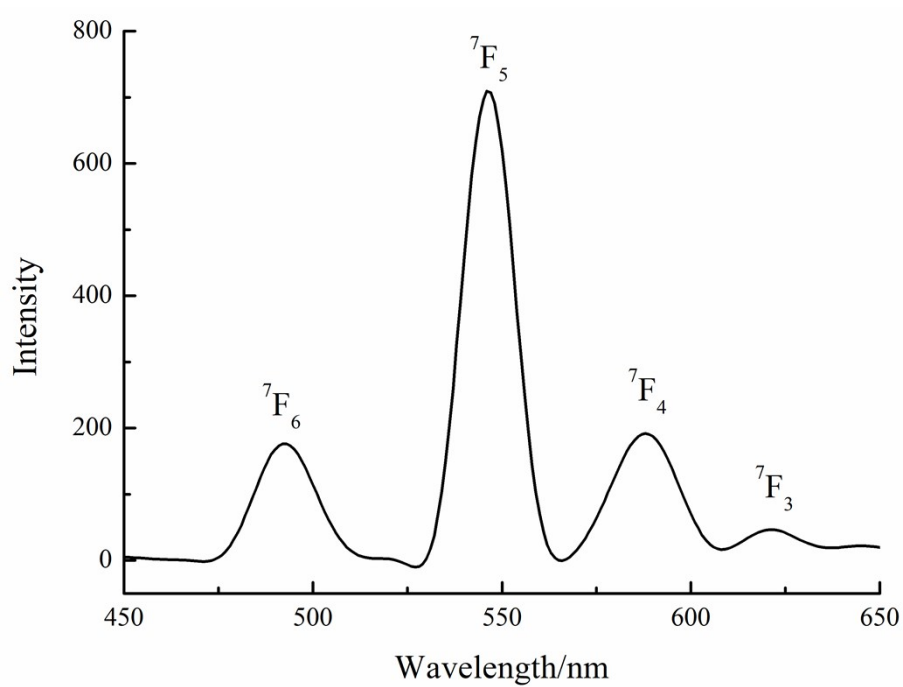

**Figure S4.** The emission spectra of **2** in solid state when excited at 300 nm.

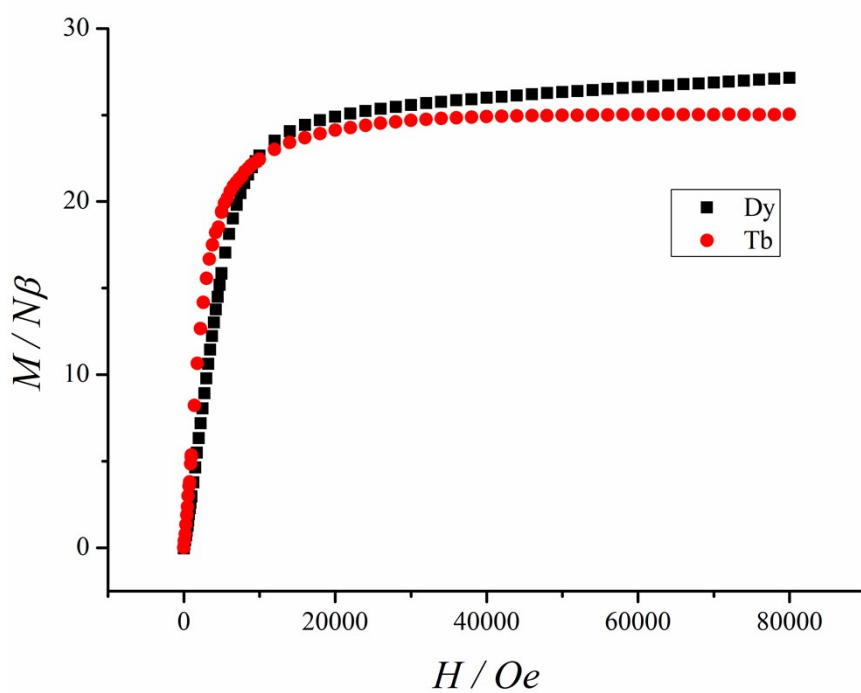

**Figure S5.** Field-dependent magnetizations of **2** and **3** at 2 K.

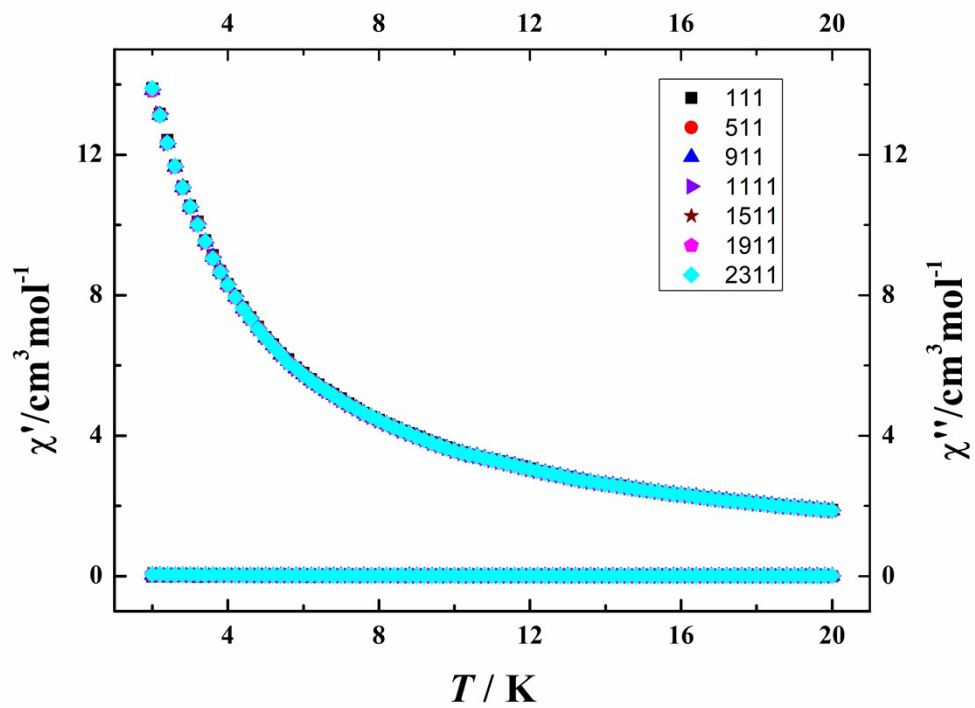

**Figure S6.** Temperature dependence of the in-phase ( $\chi'$ ) and out-of-phase ( $\chi''$ ) ac susceptibilities for **2** ( $\text{Tb}_4$ ) in  $H_{\text{dc}} = 0$  Oe with an oscillation of 3.0 Oe.
